# Supplementary material for: Comparative Proteomics Analysis for Elucidating the Interaction Between Host Cells and Toxoplasma gondii
Source: Front Cell Infect Microbiol. 2021 May 13;11:643001. doi: 10.3389/fcimb.2021.643001 (PMC8158437; doi:10.3389/fcimb.2021.643001)
Supplement: Supplementary file 6 [file Table_6.xlsx]

## Sheet: Table A
Table A KEGG pathway enrichment analysis of upregulated DEPs in HT Vs. T group.
KEGG pathway	Mapping	Background	All Mapping	All Background	Fold enrichment	Fisher's exact test p value	-log10(p value)	Related proteins
tgo03010 Ribosome	9	58	33	450	2.12	0.0166613	1.78	B6KLD4 B9PJK2 B9PNQ2 B9PTX0 B9Q1A7 B9PJR5 B9PP49 A0A125YSG6 B9PN66
tgo03008 Ribosome biogenesis in eukaryotes	4	17	33	450	3.21	0.0289199	1.54	B9PVB9 B9PZG9 B6K8L1 B9PIA9

## Sheet: Table B
Table B Summary of KEGG pathway of upregulated DEPs in HT Vs. T group.
KEGG pathway	Fisher's exact test p value	Protein accession	Protein description	Ratio	Regulated Type	P value	Gene name	MW [kDa]	Score	Coverage [%]	Peptides	PSMs	Unique peptides
tgo03030 DNA replication	0.162194	A0A125YWU4	DNA helicase OS=Toxoplasma gondii (strain ATCC 50861 / VEG) OX=432359 GN=BN1205_030920 PE=3 SV=1	3.726	Up	0.0149961	BN1205_030920	117.27	18.319	3.3	3	3	3
tgo03030 DNA replication	0.162194	V4ZAT4	DNA replication licensing factor MCM7 OS=Toxoplasma gondii (strain ATCC 50861 / VEG) OX=432359 GN=MCM7 PE=3 SV=1	2.889	Up	0.0025954	MCM7	96.758	14.96	2.9	2	3	2
tgo03010 Ribosome	0.0166613	B6KLD4	Ribosomal protein L32, putative OS=Toxoplasma gondii (strain ATCC 50861 / VEG) OX=432359 GN=BN1205_108820 PE=4 SV=1	1.734	Up	0.0103211	BN1205_108820	15.617	15.181	13.4	2	2	2
tgo03010 Ribosome	0.0166613	B9PJK2	Ribosomal protein L11, putative OS=Toxoplasma gondii (strain ATCC 50861 / VEG) OX=432359 GN=BN1205_093880 PE=3 SV=1	1.52	Up	0.00120369	BN1205_093880	20.199	69.208	11.4	2	4	2
tgo03010 Ribosome	0.0166613	B9PNQ2	60S ribosomal protein L36 OS=Toxoplasma gondii (strain ATCC 50861 / VEG) OX=432359 GN=BN1205_036110 PE=3 SV=1	1.581	Up	0.0026789	BN1205_036110	11.407	8.4679	10.9	1	1	1
tgo03010 Ribosome	0.0166613	B9PTX0	60S ribosomal protein L10, putative OS=Toxoplasma gondii (strain ATCC 50861 / VEG) OX=432359 GN=BN1205_082480 PE=4 SV=1	1.528	Up	0.0020583	BN1205_082480	24.801	25.111	14.5	3	4	3
tgo03010 Ribosome	0.0166613	B9Q1A7	60s ribosomal protein L31, putative OS=Toxoplasma gondii (strain ATCC 50861 / VEG) OX=432359 GN=BN1205_080490 PE=4 SV=1	3.933	Up	4.2454e-06	BN1205_080490	14.355	21.163	20.8	2	4	2
tgo03010 Ribosome	0.0166613	B9PJR5	Ribosomal protein L22, putative OS=Toxoplasma gondii (strain ATCC 50861 / VEG) OX=432359 GN=BN1205_094570 PE=3 SV=1	1.544	Up	0.0023786	BN1205_094570	16.344	43.512	27.9	4	7	4
tgo03010 Ribosome	0.0166613	B9PP49	40S ribosomal protein S26 OS=Toxoplasma gondii (strain ATCC 50861 / VEG) OX=432359 GN=BN1205_103450 PE=1 SV=1	7.37	Up	6.2139e-05	BN1205_103450	12.725	38.089	10.7	1	2	1
tgo03010 Ribosome	0.0166613	A0A125YSG6	40S ribosomal protein S13, putative OS=Toxoplasma gondii (strain ATCC 50861 / VEG) OX=432359 GN=BN1205_017665 PE=1 SV=1	1.954	Up	0.00146114	BN1205_017665	17.176	25.417	17.9	4	4	4
tgo03010 Ribosome	0.0166613	B9PN66	Ribosomal protein L15 OS=Toxoplasma gondii (strain ATCC 50861 / VEG) OX=432359 GN=BN1205_069230 PE=3 SV=1	2.369	Up	1.54097e-05	BN1205_069230	24.325	26.257	21	4	7	4
tgo03008 Ribosome biogenesis in eukaryotes	0.0289199	B9PVB9	Eukaryotic translation initiation factor 6 OS=Toxoplasma gondii (strain ATCC 50861 / VEG) OX=432359 GN=EIF6 PE=3 SV=3	1.791	Up	0.0071353	EIF6	28.573	21.513	10.2	2	2	2
tgo03008 Ribosome biogenesis in eukaryotes	0.0289199	B9PZG9	Centromere/microtubule binding protein,putative OS=Toxoplasma gondii (strain ATCC 50861 / VEG) OX=432359 GN=BN1205_031650 PE=4 SV=1	1.991	Up	0.0193623	BN1205_031650	56.744	6.0475	1.8	1	2	1
tgo03008 Ribosome biogenesis in eukaryotes	0.0289199	B6K8L1	Fibrillarin, putative OS=Toxoplasma gondii (strain ATCC 50861 / VEG) OX=432359 GN=BN1205_095540 PE=3 SV=1	1.951	Up	0.00012487	BN1205_095540	31.988	37.63	19.7	6	7	6
tgo03008 Ribosome biogenesis in eukaryotes	0.0289199	B9PIA9	H/ACA ribonucleoprotein complex subunit OS=Toxoplasma gondii (strain ATCC 50861 / VEG) OX=432359 GN=BN1205_019480 PE=3 SV=1	1.68	Up	0.00050179	BN1205_019480	20.931	18.562	6.2	1	2	1
tgo03015 mRNA surveillance pathway	0.330665	V4ZFL5	RNA helicase (UPF2 interacting domain) protein OS=Toxoplasma gondii (strain ATCC 50861 / VEG) OX=432359 GN=TGVEG_291820 PE=4 SV=1	1.765	Up	0.00024308	TGVEG_291820	163.5	6.9794	0.7	1	1	1
tgo03015 mRNA surveillance pathway	0.330665	B9QCY2	Nuclear cap binding protein, putative OS=Toxoplasma gondii (strain ATCC 50861 / VEG) OX=432359 GN=BN1205_002230 PE=4 SV=1	2.05	Up	0.0075988	BN1205_002230	135.97	21.353	2.5	3	3	3
tgo05145 Toxoplasmosis	0.0784019	A0A0F7UV78	Dense granule protein 5 OS=Toxoplasma gondii (strain ATCC 50861 / VEG) OX=432359 GN=BN1205_033680 PE=4 SV=1	2.229	Up	0.00187563	BN1205_033680	12.919	15.858	13.3	2	5	2
tgo05145 Toxoplasmosis	0.0784019	V5BF07	SAG-related sequence SRS36D OS=Toxoplasma gondii (strain ATCC 50861 / VEG) OX=432359 GN=TGVEG_292280 PE=4 SV=1	1.919	Up	3.795e-05	TGVEG_292280	39.225	26.764	16.6	4	4	4
tgo05145 Toxoplasmosis	0.0784019	B9Q4G2	SAG-related sequence SRS29A OS=Toxoplasma gondii (strain ATCC 50861 / VEG) OX=432359 GN=BN1205_022090 PE=4 SV=1	2.938	Up	2.3913e-06	BN1205_022090	44.241	15.892	7.1	2	2	2
tgo05145 Toxoplasmosis	0.0784019	A0A0F7V6G5	SAG-related sequence SRS57 OS=Toxoplasma gondii (strain ATCC 50861 / VEG) OX=432359 GN=BN1205_069910 PE=4 SV=1	1.769	Up	0.00056424	BN1205_069910	41.833	269.53	24.9	6	12	6

## Sheet: Table C
Table C KEGG pathway enrichment analysis of downregulated DEPs in HT Vs. T group.
KEGG pathway	Mapping	Background	All Mapping	All Background	Fold enrichment	Fisher's exact test p value	-log10(p value)	Related proteins
tgo00030 Pentose phosphate pathway	9	11	191	450	1.93	0.00871687	2.06	B6KFH7 B9QPX7 B9Q857 V4Z938 B6KRW3 A0A0F7USE7 B9PVD0 B9Q3G7 V4ZBA2
tgo00020 Citrate cycle (TCA cycle)	12	17	191	450	1.66	0.0163334	1.79	B9Q836 A0A125YTY5 B9QF24 B9PZU5 B9PZR3 B9PQP0 A0A0F7UZR3 B9PTH6 A0A125YST2 V4YQK1 V5BD96 B9QDS4
tgo00052 Galactose metabolism	4	4	191	450	2.36	0.0318685	1.5	B9Q7W4 B9QEP9 A0A0F7USE7 B9PVD0
tgo04144 Endocytosis	7	9	191	450	1.83	0.034087	1.47	B6KFQ5 A0A0F7V4M1 B9PME2 V4Z6D5 V4Z8Z4 B6KHB1 B9PXB8
tgo00520 Amino sugar and nucleotide sugar metabolism	7	9	191	450	1.83	0.034087	1.47	B9Q7W4 B9QEP9 V4Z938 A0A0F7USE7 B6KB36 A0A0F7V0Q8 B9PVD0

## Sheet: Table D
Table D Summary of KEGG pathway of downregulated DEPs in HT Vs. T group.
KEGG pathway	Fisher's exact test p value	Protein accession	Protein description	Ratio	Regulated Type	P value	Gene name	MW [kDa]	Score	Coverage [%]	Peptides	PSMs	Unique peptides
tgo00030 Pentose phosphate pathway	0.00871687	B6KFH7	Probable ATP-dependent 6-phosphofructokinase OS=Toxoplasma gondii (strain ATCC 50861 / VEG) OX=432359 GN=BN1205_090400 PE=3 SV=1	0.2	down	3.4755e-07	BN1205_090400	154.69	15.127	1.7	2	2	2
tgo00030 Pentose phosphate pathway	0.00871687	B9QPX7	Phosphoribosylpyrophosphate synthetase,putative OS=Toxoplasma gondii (strain ATCC 50861 / VEG) OX=432359 GN=BN1205_087410 PE=4 SV=1	0.354	down	0.00010422	BN1205_087410	60.997	48.371	13.3	5	6	5
tgo00030 Pentose phosphate pathway	0.00871687	B9Q857	Pyrophosphate--fructose 6-phosphate 1-phosphotransferase OS=Toxoplasma gondii (strain ATCC 50861 / VEG) OX=432359 GN=BN1205_067980 PE=3 SV=1	0.344	down	3.7736e-06	BN1205_067980	131.36	210.16	22.9	22	34	22
tgo00030 Pentose phosphate pathway	0.00871687	V4Z938	Glucose-6-phosphate isomerase OS=Toxoplasma gondii (strain ATCC 50861 / VEG) OX=432359 GN=TGVEG_283780 PE=3 SV=1	0.292	down	4.3954e-05	TGVEG_283780	74.274	58.143	11.5	6	12	6
tgo00030 Pentose phosphate pathway	0.00871687	B6KRW3	Glucose-6-phosphate 1-dehydrogenase OS=Toxoplasma gondii (strain ATCC 50861 / VEG) OX=432359 GN=TGVEG_278830 PE=3 SV=1	0.296	down	2.0727e-05	TGVEG_278830	98.279	142.55	19.2	11	16	10
tgo00030 Pentose phosphate pathway	0.00871687	A0A0F7USE7	Glucosephosphate-mutase GPM1 OS=Toxoplasma gondii (strain ATCC 50861 / VEG) OX=432359 GN=BN1205_033350 PE=4 SV=1	0.448	down	2.7676e-06	BN1205_033350	70.572	102.7	25.3	11	14	11
tgo00030 Pentose phosphate pathway	0.00871687	B9PVD0	Glucosephosphate-mutase GPM2 OS=Toxoplasma gondii (strain ATCC 50861 / VEG) OX=432359 GN=BN1205_009980 PE=3 SV=1	0.43	down	4.8175e-06	BN1205_009980	65.895	12.071	4.9	2	2	2
tgo00030 Pentose phosphate pathway	0.00871687	B9Q3G7	6-phosphogluconate dehydrogenase, decarboxylating OS=Toxoplasma gondii (strain ATCC 50861 / VEG) OX=432359 GN=BN1205_069740 PE=3 SV=1	0.435	down	0.000198985	BN1205_069740	54.734	58.424	8.3	3	5	3
tgo00030 Pentose phosphate pathway	0.00871687	V4ZBA2	Transketolase OS=Toxoplasma gondii (strain ATCC 50861 / VEG) OX=432359 GN=TGVEG_318310 PE=3 SV=1	0.388	down	4.191e-05	TGVEG_318310	76.904	47.553	10.2	6	10	6
tgo03410 Base excision repair	0.207485	B9PPR0	Proliferating cell nuclear antigen OS=Toxoplasma gondii (strain ATCC 50861 / VEG) OX=432359 GN=BN1205_004340 PE=3 SV=1	0.42	down	3.1314e-06	BN1205_004340	34.551	43.745	22.7	6	7	6
tgo03410 Base excision repair	0.207485	B9QDU2	Endonuclease IV APN OS=Toxoplasma gondii (strain ATCC 50861 / VEG) OX=432359 GN=BN1205_082440 PE=3 SV=1	0.268	down	2.1163e-06	BN1205_082440	72.273	34.29	4.3	3	4	3
tgo03410 Base excision repair	0.207485	B6KHT0	Flap endonuclease 1 OS=Toxoplasma gondii (strain ATCC 50861 / VEG) OX=432359 GN=FEN1 PE=3 SV=1	0.365	down	0.0092438	FEN1	60.295	16.626	5.4	3	3	3
tgo00051 Fructose and mannose metabolism	0.126758	B6KFH7	Probable ATP-dependent 6-phosphofructokinase OS=Toxoplasma gondii (strain ATCC 50861 / VEG) OX=432359 GN=BN1205_090400 PE=3 SV=1	0.2	down	3.4755e-07	BN1205_090400	154.69	15.127	1.7	2	2	2
tgo00051 Fructose and mannose metabolism	0.126758	B9QEP9	Phosphotransferase OS=Toxoplasma gondii (strain ATCC 50861 / VEG) OX=432359 GN=BN1205_080890 PE=3 SV=1	0.26	down	1.69e-06	BN1205_080890	51.467	60.456	16	7	11	7
tgo00051 Fructose and mannose metabolism	0.126758	B9Q857	Pyrophosphate--fructose 6-phosphate 1-phosphotransferase OS=Toxoplasma gondii (strain ATCC 50861 / VEG) OX=432359 GN=BN1205_067980 PE=3 SV=1	0.344	down	3.7736e-06	BN1205_067980	131.36	210.16	22.9	22	34	22
tgo00051 Fructose and mannose metabolism	0.126758	B9PMJ9	Triosephosphate isomerase OS=Toxoplasma gondii (strain ATCC 50861 / VEG) OX=432359 GN=BN1205_066900 PE=3 SV=1	0.374	down	3.1309e-06	BN1205_066900	27.89	54.62	40.3	8	10	8
tgo00051 Fructose and mannose metabolism	0.126758	B6KK36	Triosephosphate isomerase OS=Toxoplasma gondii (strain ATCC 50861 / VEG) OX=432359 GN=BN1205_022030 PE=3 SV=1	0.298	down	0.00062484	BN1205_022030	39.559	12.918	5.9	2	2	2
tgo00051 Fructose and mannose metabolism	0.126758	B6KB36	GDP-D-mannose pyrophosphorylase OS=Toxoplasma gondii (strain ATCC 50861 / VEG) OX=432359 GN=TGVEG_257960 PE=4 SV=1	0.345	down	5.9999e-07	TGVEG_257960	47.703	21.379	6.2	2	2	2
tgo00562 Inositol phosphate metabolism	0.0757726	A0A0F7UUA3	CDP-diacylglycerol--inositol 3-phosphatidyltransferase OS=Toxoplasma gondii (strain ATCC 50861 / VEG) OX=432359 GN=BN1205_040580 PE=3 SV=1	0.356	down	7.8577e-05	BN1205_040580	27.857	7.4337	4.7	1	1	1
tgo00562 Inositol phosphate metabolism	0.0757726	B9PMJ9	Triosephosphate isomerase OS=Toxoplasma gondii (strain ATCC 50861 / VEG) OX=432359 GN=BN1205_066900 PE=3 SV=1	0.374	down	3.1309e-06	BN1205_066900	27.89	54.62	40.3	8	10	8
tgo00562 Inositol phosphate metabolism	0.0757726	B6KK36	Triosephosphate isomerase OS=Toxoplasma gondii (strain ATCC 50861 / VEG) OX=432359 GN=BN1205_022030 PE=3 SV=1	0.298	down	0.00062484	BN1205_022030	39.559	12.918	5.9	2	2	2
tgo00500 Starch and sucrose metabolism	0.120032	B9QEP9	Phosphotransferase OS=Toxoplasma gondii (strain ATCC 50861 / VEG) OX=432359 GN=BN1205_080890 PE=3 SV=1	0.26	down	1.69e-06	BN1205_080890	51.467	60.456	16	7	11	7
tgo00500 Starch and sucrose metabolism	0.120032	A0A125YFU7	Alpha-1,4 glucan phosphorylase OS=Toxoplasma gondii (strain ATCC 50861 / VEG) OX=432359 GN=BN1205_094750 PE=3 SV=1	0.49	down	2.0989e-06	BN1205_094750	105.54	248.36	26.8	20	20	20
tgo00500 Starch and sucrose metabolism	0.120032	V4Z938	Glucose-6-phosphate isomerase OS=Toxoplasma gondii (strain ATCC 50861 / VEG) OX=432359 GN=TGVEG_283780 PE=3 SV=1	0.292	down	4.3954e-05	TGVEG_283780	74.274	58.143	11.5	6	12	6
tgo00500 Starch and sucrose metabolism	0.120032	A0A0F7USE7	Glucosephosphate-mutase GPM1 OS=Toxoplasma gondii (strain ATCC 50861 / VEG) OX=432359 GN=BN1205_033350 PE=4 SV=1	0.448	down	2.7676e-06	BN1205_033350	70.572	102.7	25.3	11	14	11
tgo00500 Starch and sucrose metabolism	0.120032	B9PVD0	Glucosephosphate-mutase GPM2 OS=Toxoplasma gondii (strain ATCC 50861 / VEG) OX=432359 GN=BN1205_009980 PE=3 SV=1	0.43	down	4.8175e-06	BN1205_009980	65.895	12.071	4.9	2	2	2
tgo00900 Terpenoid backbone biosynthesis	0.387282	V4YPG9	CAAX prenyl protease (Fragment) OS=Toxoplasma gondii (strain ATCC 50861 / VEG) OX=432359 GN=TGVEG_221170B PE=3 SV=1	0.37	down	0.00023757	TGVEG_221170B	23.207	6.6331	5.5	1	1	1
tgo00900 Terpenoid backbone biosynthesis	0.387282	V5B2X9	CAAX metallo endopeptidase (Fragment) OS=Toxoplasma gondii (strain ATCC 50861 / VEG) OX=432359 GN=TGVEG_221170A PE=4 SV=1	0.298	down	3.4814e-06	TGVEG_221170A	26.228	14.772	9.1	2	3	2
tgo00380 Tryptophan metabolism	0.387282	B9QF24	Dihydrolipoyl dehydrogenase OS=Toxoplasma gondii (strain ATCC 50861 / VEG) OX=432359 GN=BN1205_043130 PE=3 SV=1	0.318	down	0.004495	BN1205_043130	55.151	35.762	10.8	5	5	5
tgo00380 Tryptophan metabolism	0.387282	B9PQP0	Dihydrolipoamide succinyltransferase component of 2-oxoglutaratedehydrogenase complex, putative OS=Toxoplasma gondii (strain ATCC 50861 / VEG) OX=432359 GN=BN1205_070400 PE=4 SV=1	0.236	down	2.7965e-06	BN1205_070400	50.125	17.762	7.9	3	4	3
tgo00520 Amino sugar and nucleotide sugar metabolism	0.034087	B9Q7W4	UDP-glucose 4-epimerase, putative OS=Toxoplasma gondii (strain ATCC 50861 / VEG) OX=432359 GN=BN1205_066850 PE=3 SV=1	0.316	down	3.7128e-05	BN1205_066850	39.778	14.991	6.6	2	2	2
tgo00520 Amino sugar and nucleotide sugar metabolism	0.034087	B9QEP9	Phosphotransferase OS=Toxoplasma gondii (strain ATCC 50861 / VEG) OX=432359 GN=BN1205_080890 PE=3 SV=1	0.26	down	1.69e-06	BN1205_080890	51.467	60.456	16	7	11	7
tgo00520 Amino sugar and nucleotide sugar metabolism	0.034087	V4Z938	Glucose-6-phosphate isomerase OS=Toxoplasma gondii (strain ATCC 50861 / VEG) OX=432359 GN=TGVEG_283780 PE=3 SV=1	0.292	down	4.3954e-05	TGVEG_283780	74.274	58.143	11.5	6	12	6
tgo00520 Amino sugar and nucleotide sugar metabolism	0.034087	A0A0F7USE7	Glucosephosphate-mutase GPM1 OS=Toxoplasma gondii (strain ATCC 50861 / VEG) OX=432359 GN=BN1205_033350 PE=4 SV=1	0.448	down	2.7676e-06	BN1205_033350	70.572	102.7	25.3	11	14	11
tgo00520 Amino sugar and nucleotide sugar metabolism	0.034087	B6KB36	GDP-D-mannose pyrophosphorylase OS=Toxoplasma gondii (strain ATCC 50861 / VEG) OX=432359 GN=TGVEG_257960 PE=4 SV=1	0.345	down	5.9999e-07	TGVEG_257960	47.703	21.379	6.2	2	2	2
tgo00520 Amino sugar and nucleotide sugar metabolism	0.034087	A0A0F7V0Q8	Glucosamine--fructose-6-phosphate aminotransferase (Isomerizing), putative OS=Toxoplasma gondii (strain ATCC 50861 / VEG) OX=432359 GN=BN1205_024220 PE=4 SV=1	0.246	down	0.00194398	BN1205_024220	96.712	6.4611	1.8	1	1	1
tgo00520 Amino sugar and nucleotide sugar metabolism	0.034087	B9PVD0	Glucosephosphate-mutase GPM2 OS=Toxoplasma gondii (strain ATCC 50861 / VEG) OX=432359 GN=BN1205_009980 PE=3 SV=1	0.43	down	4.8175e-06	BN1205_009980	65.895	12.071	4.9	2	2	2
tgo00052 Galactose metabolism	0.0318685	B9Q7W4	UDP-glucose 4-epimerase, putative OS=Toxoplasma gondii (strain ATCC 50861 / VEG) OX=432359 GN=BN1205_066850 PE=3 SV=1	0.316	down	3.7128e-05	BN1205_066850	39.778	14.991	6.6	2	2	2
tgo00052 Galactose metabolism	0.0318685	B9QEP9	Phosphotransferase OS=Toxoplasma gondii (strain ATCC 50861 / VEG) OX=432359 GN=BN1205_080890 PE=3 SV=1	0.26	down	1.69e-06	BN1205_080890	51.467	60.456	16	7	11	7
tgo00052 Galactose metabolism	0.0318685	A0A0F7USE7	Glucosephosphate-mutase GPM1 OS=Toxoplasma gondii (strain ATCC 50861 / VEG) OX=432359 GN=BN1205_033350 PE=4 SV=1	0.448	down	2.7676e-06	BN1205_033350	70.572	102.7	25.3	11	14	11
tgo00052 Galactose metabolism	0.0318685	B9PVD0	Glucosephosphate-mutase GPM2 OS=Toxoplasma gondii (strain ATCC 50861 / VEG) OX=432359 GN=BN1205_009980 PE=3 SV=1	0.43	down	4.8175e-06	BN1205_009980	65.895	12.071	4.9	2	2	2
tgo00310 Lysine degradation	0.179609	B9QF24	Dihydrolipoyl dehydrogenase OS=Toxoplasma gondii (strain ATCC 50861 / VEG) OX=432359 GN=BN1205_043130 PE=3 SV=1	0.318	down	0.004495	BN1205_043130	55.151	35.762	10.8	5	5	5
tgo00310 Lysine degradation	0.179609	B9PQP0	Dihydrolipoamide succinyltransferase component of 2-oxoglutaratedehydrogenase complex, putative OS=Toxoplasma gondii (strain ATCC 50861 / VEG) OX=432359 GN=BN1205_070400 PE=4 SV=1	0.236	down	2.7965e-06	BN1205_070400	50.125	17.762	7.9	3	4	3
tgo04144 Endocytosis	0.034087	B6KFQ5	Vacuolar protein sorting-associated protein 35 OS=Toxoplasma gondii (strain ATCC 50861 / VEG) OX=432359 GN=BN1205_102760 PE=3 SV=1	0.309	down	0.000101966	BN1205_102760	95.635	18.69	3.4	3	3	3
tgo04144 Endocytosis	0.034087	A0A0F7V4M1	Heat shock protein 70, putative OS=Toxoplasma gondii (strain ATCC 50861 / VEG) OX=432359 GN=BN1205_021100 PE=3 SV=1	0.426	down	3.3014e-06	BN1205_021100	72.292	196.78	42.4	26	55	20
tgo04144 Endocytosis	0.034087	B9PME2	ARF1-directed GTPase-activating protein,putative OS=Toxoplasma gondii (strain ATCC 50861 / VEG) OX=432359 GN=BN1205_066390 PE=4 SV=1	0.199	down	0.00053957	BN1205_066390	52.458	60.931	8.2	2	2	2
tgo04144 Endocytosis	0.034087	V4Z6D5	Sarcalumenin/eps15 family protein (Fragment) OS=Toxoplasma gondii (strain ATCC 50861 / VEG) OX=432359 GN=TGVEG_231210 PE=3 SV=1	0.499	down	0.000162239	TGVEG_231210	65.562	21.512	5.9	3	6	3
tgo04144 Endocytosis	0.034087	V4Z8Z4	Putative vacuolar protein sorting-associated protein 26 OS=Toxoplasma gondii (strain ATCC 50861 / VEG) OX=432359 GN=TGVEG_263500 PE=4 SV=1	0.436	down	8.8961e-07	TGVEG_263500	42.382	49.328	8.4	2	3	2
tgo04144 Endocytosis	0.034087	B6KHB1	GTPase RAB7 OS=Toxoplasma gondii (strain ATCC 50861 / VEG) OX=432359 GN=TGVEG_248880 PE=4 SV=1	0.26	down	0.000135277	TGVEG_248880	47.712	30.789	15	5	8	2
tgo04144 Endocytosis	0.034087	B9PXB8	Vacuolar protein sorting-associated protein 29 OS=Toxoplasma gondii (strain ATCC 50861 / VEG) OX=432359 GN=BN1205_056190 PE=3 SV=1	0.374	down	3.9657e-05	BN1205_056190	22.278	29.877	15.3	3	4	3
tgo03440 Homologous recombination	0.387282	V4YZV7	DNA topoisomerase OS=Toxoplasma gondii (strain ATCC 50861 / VEG) OX=432359 GN=TGVEG_264450 PE=3 SV=1	0.351	down	1.67084e-05	TGVEG_264450	94.858	14.318	2.7	2	2	2
tgo03440 Homologous recombination	0.387282	B9QD54	Nuclear factor NF7 OS=Toxoplasma gondii (strain ATCC 50861 / VEG) OX=432359 GN=BN1205_002980 PE=4 SV=1	0.355	down	7.9567e-05	BN1205_002980	54.305	62.89	19.1	8	13	8
tgo00860 Porphyrin and chlorophyll metabolism	0.387282	V5B2D2	Coproporphyrinogen III oxidase OS=Toxoplasma gondii (strain ATCC 50861 / VEG) OX=432359 GN=BN1205_053540 PE=4 SV=1	0.349	down	0.00055573	BN1205_053540	41.733	6.3798	2.5	1	1	1
tgo00860 Porphyrin and chlorophyll metabolism	0.387282	V4YUG0	Glutamate-tRNA ligase OS=Toxoplasma gondii (strain ATCC 50861 / VEG) OX=432359 GN=TGVEG_263870 PE=3 SV=1	0.329	down	1.2552e-06	TGVEG_263870	92.524	220.19	16.8	11	14	11
tgo00280 Valine, leucine and isoleucine degradation	0.387282	B9QF24	Dihydrolipoyl dehydrogenase OS=Toxoplasma gondii (strain ATCC 50861 / VEG) OX=432359 GN=BN1205_043130 PE=3 SV=1	0.318	down	0.004495	BN1205_043130	55.151	35.762	10.8	5	5	5
tgo00280 Valine, leucine and isoleucine degradation	0.387282	B9PIV3	Branched-chain alpha-keto acid dehydrogenase E1 component beta chain, putative OS=Toxoplasma gondii (strain ATCC 50861 / VEG) OX=432359 GN=BN1205_099490 PE=4 SV=1	0.296	down	4.4301e-06	BN1205_099490	45.598	32.695	9.9	3	6	3
tgo00730 Thiamine metabolism	0.179609	B9PM93	Adenylate kinase, putative OS=Toxoplasma gondii (strain ATCC 50861 / VEG) OX=432359 GN=BN1205_065740 PE=3 SV=1	0.411	down	2.4236e-06	BN1205_065740	28.56	35.384	18.7	4	6	4
tgo00730 Thiamine metabolism	0.179609	V4Z6Q0	Aminotransferase, class V superfamily protein OS=Toxoplasma gondii (strain ATCC 50861 / VEG) OX=432359 GN=BN1205_008950 PE=4 SV=1	0.434	down	6.325e-08	BN1205_008950	68.023	47.698	11.7	5	5	5
tgo00480 Glutathione metabolism	0.126758	B9QEL4	Glutathione peroxidase OS=Toxoplasma gondii (strain ATCC 50861 / VEG) OX=432359 GN=BN1205_080440 PE=3 SV=1	0.463	down	0.00141658	BN1205_080440	37.184	25.216	12	3	4	2
tgo00480 Glutathione metabolism	0.126758	B9Q7I4	Putative aminopeptidase N OS=Toxoplasma gondii (strain ATCC 50861 / VEG) OX=432359 GN=TGVEG_224350 PE=4 SV=1	0.467	down	3.5083e-05	TGVEG_224350	156.88	80.213	8.4	11	13	10
tgo00480 Glutathione metabolism	0.126758	A0A125YST2	Isocitrate dehydrogenase OS=Toxoplasma gondii (strain ATCC 50861 / VEG) OX=432359 GN=TGVEG_313140 PE=4 SV=1	0.366	down	2.3785e-05	TGVEG_313140	68.295	99.943	22.4	13	15	13
tgo00480 Glutathione metabolism	0.126758	B6KRW3	Glucose-6-phosphate 1-dehydrogenase OS=Toxoplasma gondii (strain ATCC 50861 / VEG) OX=432359 GN=TGVEG_278830 PE=3 SV=1	0.296	down	2.0727e-05	TGVEG_278830	98.279	142.55	19.2	11	16	10
tgo00480 Glutathione metabolism	0.126758	B9Q3G7	6-phosphogluconate dehydrogenase, decarboxylating OS=Toxoplasma gondii (strain ATCC 50861 / VEG) OX=432359 GN=BN1205_069740 PE=3 SV=1	0.435	down	0.000198985	BN1205_069740	54.734	58.424	8.3	3	5	3
tgo00480 Glutathione metabolism	0.126758	A0A0F7UZR3	Isocitrate dehydrogenase, putative OS=Toxoplasma gondii (strain ATCC 50861 / VEG) OX=432359 GN=BN1205_086250 PE=4 SV=1	0.24	down	1.75309e-05	BN1205_086250	66.341	12.145	6.4	3	3	1
tgo00020 Citrate cycle (TCA cycle)	0.0163334	B9Q836	Aconitate hydratase ACN/IRP OS=Toxoplasma gondii (strain ATCC 50861 / VEG) OX=432359 GN=BN1205_067770 PE=4 SV=1	0.29	down	2.1772e-05	BN1205_067770	114.87	124.99	17	15	21	15
tgo00020 Citrate cycle (TCA cycle)	0.0163334	A0A125YTY5	2-oxoglutarate dehydrogenase, putative OS=Toxoplasma gondii (strain ATCC 50861 / VEG) OX=432359 GN=BN1205_103920 PE=4 SV=1	0.33	down	4.6116e-06	BN1205_103920	124.25	92.914	14.4	10	11	10
tgo00020 Citrate cycle (TCA cycle)	0.0163334	B9QF24	Dihydrolipoyl dehydrogenase OS=Toxoplasma gondii (strain ATCC 50861 / VEG) OX=432359 GN=BN1205_043130 PE=3 SV=1	0.318	down	0.004495	BN1205_043130	55.151	35.762	10.8	5	5	5
tgo00020 Citrate cycle (TCA cycle)	0.0163334	B9PZU5	Succinate dehydrogenase [ubiquinone] flavoprotein subunit, mitochondrial OS=Toxoplasma gondii (strain ATCC 50861 / VEG) OX=432359 GN=BN1205_030210 PE=3 SV=1	0.4	down	5.6263e-05	BN1205_030210	72.733	61.05	9.6	5	5	5
tgo00020 Citrate cycle (TCA cycle)	0.0163334	B9PZR3	Succinate dehydrogenase [ubiquinone] iron-sulfur subunit, mitochondrial OS=Toxoplasma gondii (strain ATCC 50861 / VEG) OX=432359 GN=BN1205_030620 PE=3 SV=1	0.209	down	8.3655e-07	BN1205_030620	38.61	42.403	14.3	5	7	5
tgo00020 Citrate cycle (TCA cycle)	0.0163334	B9PQP0	Dihydrolipoamide succinyltransferase component of 2-oxoglutaratedehydrogenase complex, putative OS=Toxoplasma gondii (strain ATCC 50861 / VEG) OX=432359 GN=BN1205_070400 PE=4 SV=1	0.236	down	2.7965e-06	BN1205_070400	50.125	17.762	7.9	3	4	3
tgo00020 Citrate cycle (TCA cycle)	0.0163334	A0A0F7UZR3	Isocitrate dehydrogenase, putative OS=Toxoplasma gondii (strain ATCC 50861 / VEG) OX=432359 GN=BN1205_086250 PE=4 SV=1	0.24	down	1.75309e-05	BN1205_086250	66.341	12.145	6.4	3	3	1
tgo00020 Citrate cycle (TCA cycle)	0.0163334	B9PTH6	Succinate--CoA ligase [ADP-forming] subunit alpha, mitochondrial OS=Toxoplasma gondii (strain ATCC 50861 / VEG) OX=432359 GN=BN1205_084010 PE=3 SV=1	0.279	down	4.0912e-05	BN1205_084010	35.09	74.152	20.4	6	9	6
tgo00020 Citrate cycle (TCA cycle)	0.0163334	A0A125YST2	Isocitrate dehydrogenase OS=Toxoplasma gondii (strain ATCC 50861 / VEG) OX=432359 GN=TGVEG_313140 PE=4 SV=1	0.366	down	2.3785e-05	TGVEG_313140	68.295	99.943	22.4	13	15	13
tgo00020 Citrate cycle (TCA cycle)	0.0163334	V4YQK1	Pyruvate carboxylase, putative OS=Toxoplasma gondii (strain ATCC 50861 / VEG) OX=432359 GN=BN1205_032410 PE=4 SV=1	0.421	down	7.5819e-05	BN1205_032410	152.1	45.086	4.5	3	3	3
tgo00020 Citrate cycle (TCA cycle)	0.0163334	V5BD96	Fumarate hydratase OS=Toxoplasma gondii (strain ATCC 50861 / VEG) OX=432359 GN=TGVEG_267330 PE=4 SV=1	0.469	down	0.00021598	TGVEG_267330	84.395	45.456	9.9	7	7	7
tgo00020 Citrate cycle (TCA cycle)	0.0163334	B9QDS4	FAD Malate-dehydrogenase (MDH-FAD) OS=Toxoplasma gondii (strain ATCC 50861 / VEG) OX=432359 GN=BN1205_082260 PE=4 SV=1	0.422	down	0.00139661	BN1205_082260	60.364	62.119	17.3	8	14	8
tgo01210 2-Oxocarboxylic acid metabolism	0.207485	B9Q836	Aconitate hydratase ACN/IRP OS=Toxoplasma gondii (strain ATCC 50861 / VEG) OX=432359 GN=BN1205_067770 PE=4 SV=1	0.29	down	2.1772e-05	BN1205_067770	114.87	124.99	17	15	21	15
tgo01210 2-Oxocarboxylic acid metabolism	0.207485	A0A125YST2	Isocitrate dehydrogenase OS=Toxoplasma gondii (strain ATCC 50861 / VEG) OX=432359 GN=TGVEG_313140 PE=4 SV=1	0.366	down	2.3785e-05	TGVEG_313140	68.295	99.943	22.4	13	15	13
tgo01210 2-Oxocarboxylic acid metabolism	0.207485	A0A0F7UZR3	Isocitrate dehydrogenase, putative OS=Toxoplasma gondii (strain ATCC 50861 / VEG) OX=432359 GN=BN1205_086250 PE=4 SV=1	0.24	down	1.75309e-05	BN1205_086250	66.341	12.145	6.4	3	3	1
tgo04070 Phosphatidylinositol signaling system	0.207485	A0A0F7UUA3	CDP-diacylglycerol--inositol 3-phosphatidyltransferase OS=Toxoplasma gondii (strain ATCC 50861 / VEG) OX=432359 GN=BN1205_040580 PE=3 SV=1	0.356	down	7.8577e-05	BN1205_040580	27.857	7.4337	4.7	1	1	1
tgo04070 Phosphatidylinositol signaling system	0.207485	B9PZ33	Calmodulin, putative OS=Toxoplasma gondii (strain ATCC 50861 / VEG) OX=432359 GN=BN1205_106470 PE=4 SV=1	0.376	down	2.4982e-06	BN1205_106470	15.277	88.09	57.9	7	10	7
tgo04070 Phosphatidylinositol signaling system	0.207485	A0A125YUM0	Putative calmodulin OS=Toxoplasma gondii (strain ATCC 50861 / VEG) OX=432359 GN=TGVEG_269442 PE=4 SV=1	0.353	down	3.5749e-06	TGVEG_269442	9.7801	44.966	24.1	3	5	3
